# Supplementary material for: Protection levels of N95-level respirator substitutes proposed during the COVID-19 pandemic: safety concerns and quantitative evaluation procedures
Source: PubMed Central journal article supplement — BMJ Open. 2021 Sep 2;11(9):e045557. doi: 10.1136/bmjopen-2020-045557 (PMC8413478; doi:10.1136/bmjopen-2020-045557), 2021-09-02
Supplement: bmjopen-2020-045557supp002.pdf [file bmjopen-2020-045557supp002.pdf]

## Supplemental Figure Document

Supplemental Figure 1.

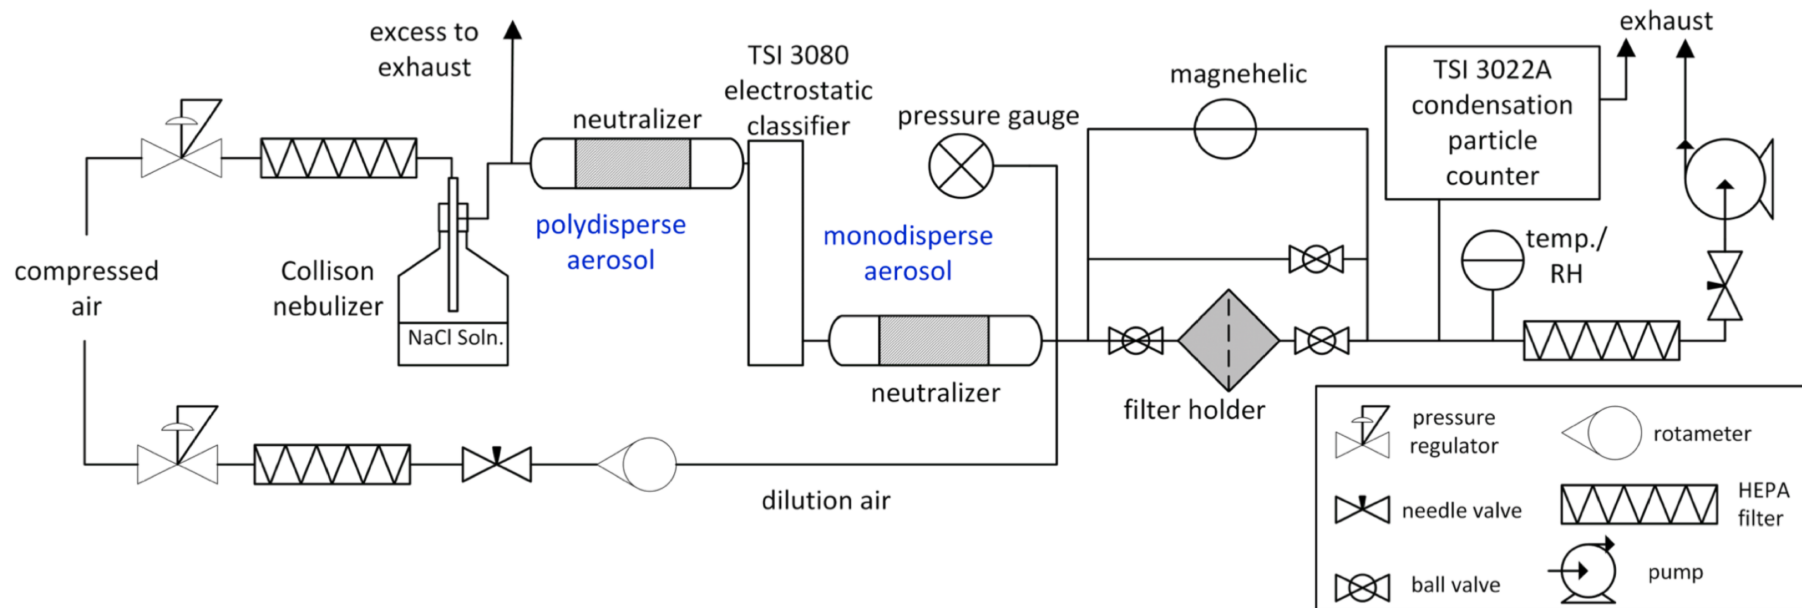

Supplemental Figure 1. Flow diagram of the aerosol filtration testing station.

**Supplemental Figure 2.**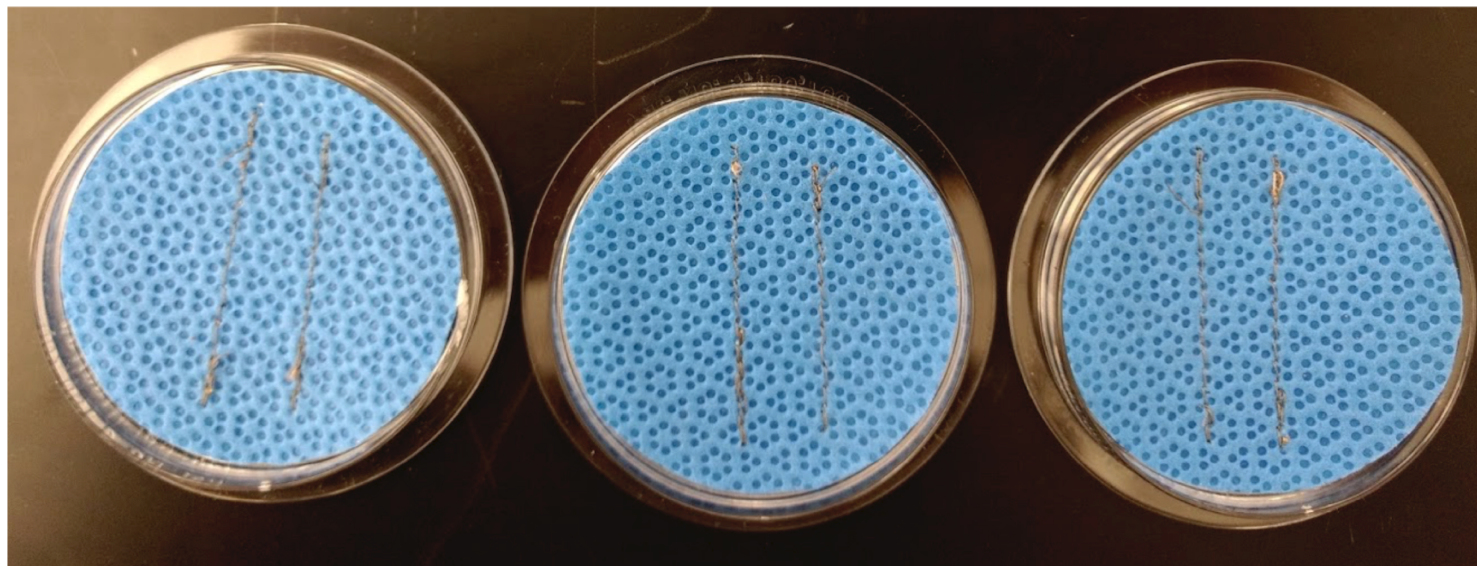

**Supplemental Figure 2.** 47 mm discs were cut from H600 sterilization wrap fabric sheets (Halyard Health, Alpharetta, GA) and stitched with two straight lines using a sewing machine. The total length of stitching on each of the three filters was 6.7, 6.5, and 7.0 cm.

Supplemental Figure 3.

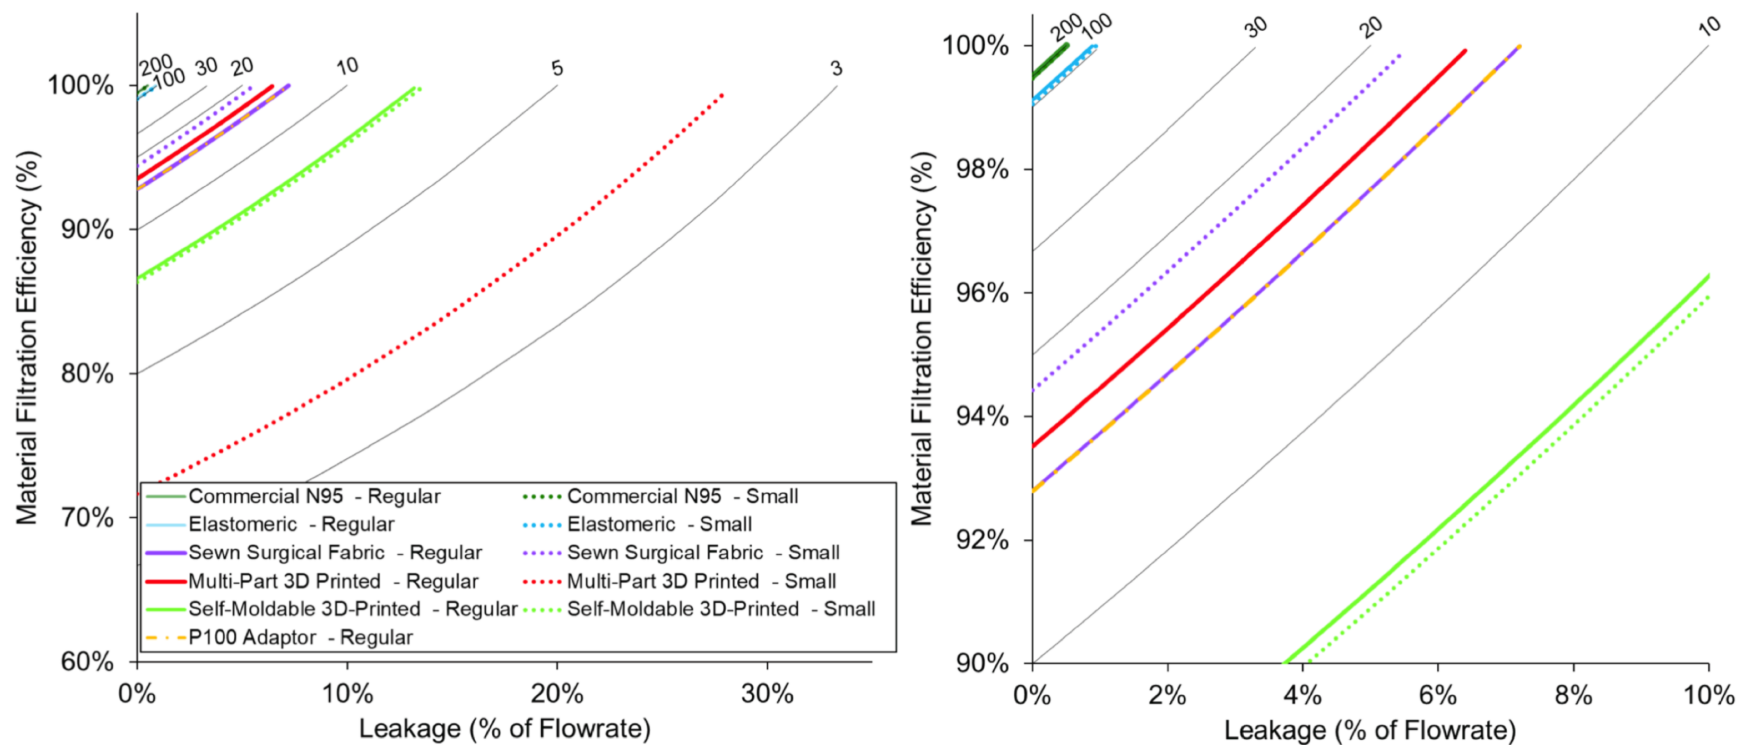

**Supplemental Figure 3.** Lines represent combinations of material filtration efficiency performance (%) and leakage (ie. around the face seal or through defects; % of flowrate) which result in a given fit factor.

Supplemental Figure 4.

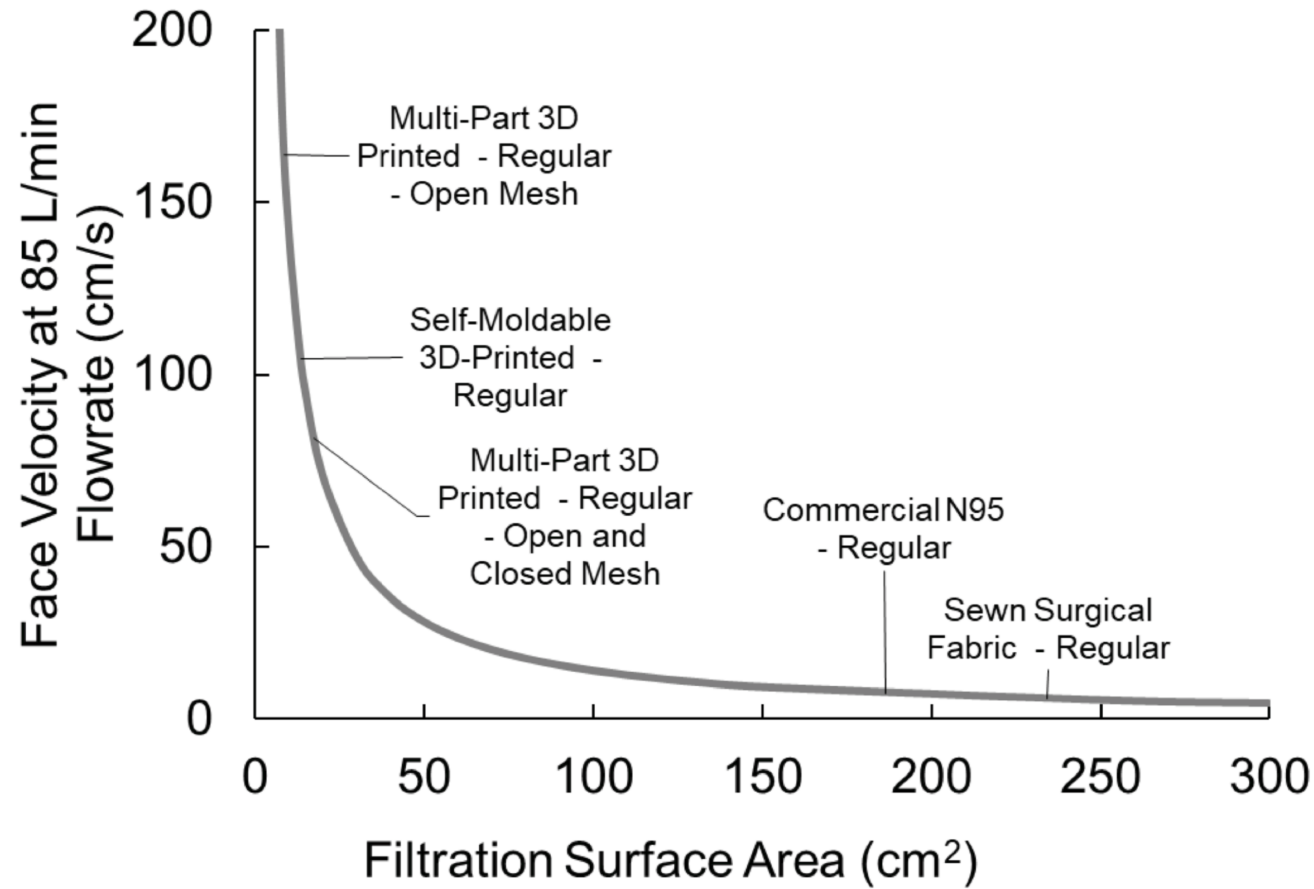

Supplemental Figure 4. Face velocity of 85 L/min as a function of filtration surface area.

Supplemental Figure 5.

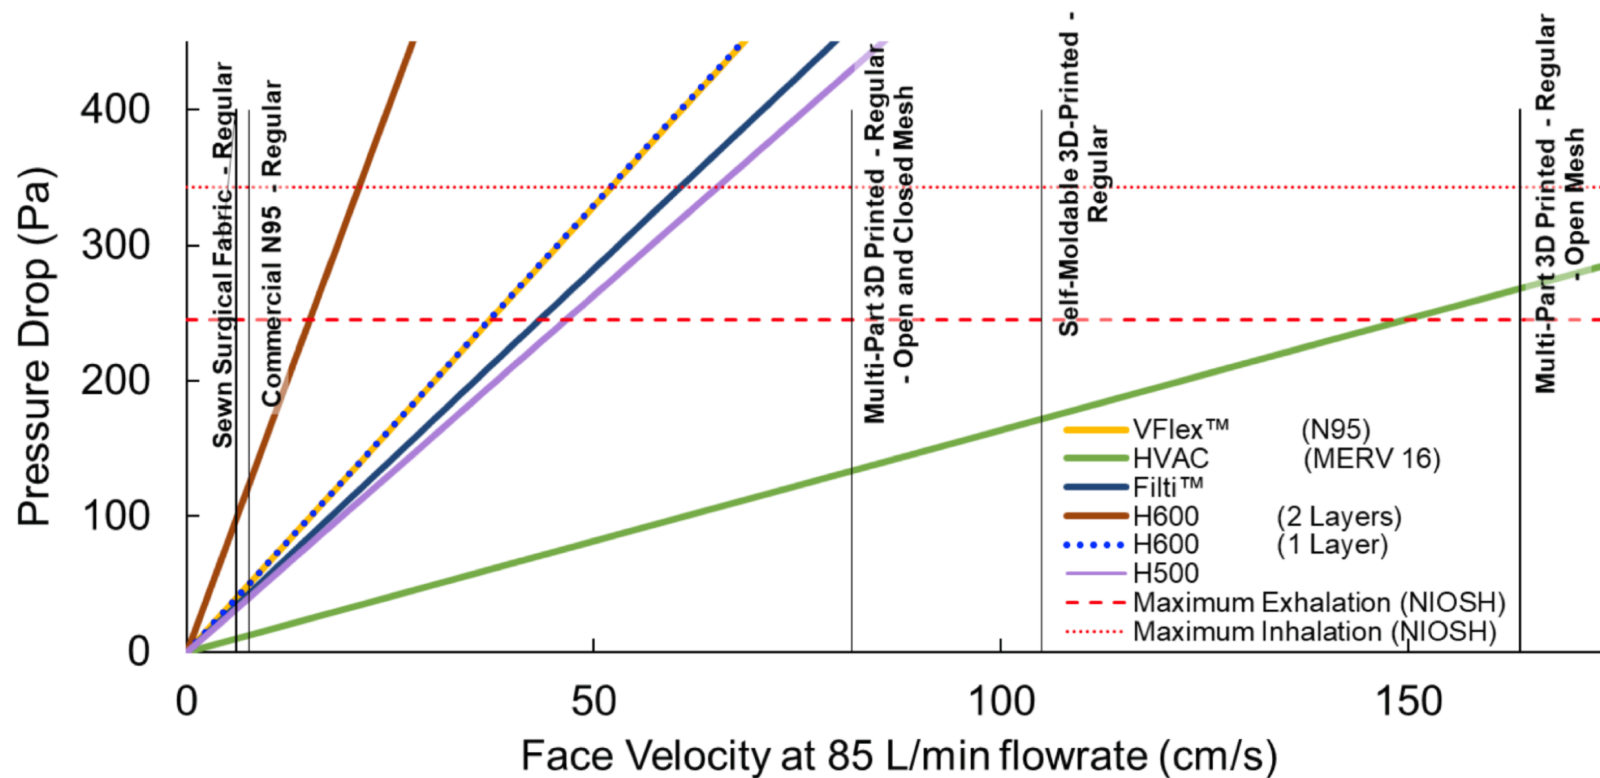

**Supplemental Figure 5.** For several materials, pressure drop is modeled as a function of face velocity. Vertical lines represent the characteristic face velocity for 85 L/min flowrate through the filtration area of the improvised designs.
